# Supplementary material for: RIP3-mediated microglial necroptosis promotes neuroinflammation and neurodegeneration in the early stages of diabetic retinopathy
Source: PubMed Central journal article supplement (PMC10060420; doi:10.1038/s41419-023-05660-z), 2023-03-29
Supplement: 41419_2023_5660_MOESM5_ESM.pdf [file 41419_2023_5660_MOESM5_ESM.pdf]

Western blot gels

# Figure 2

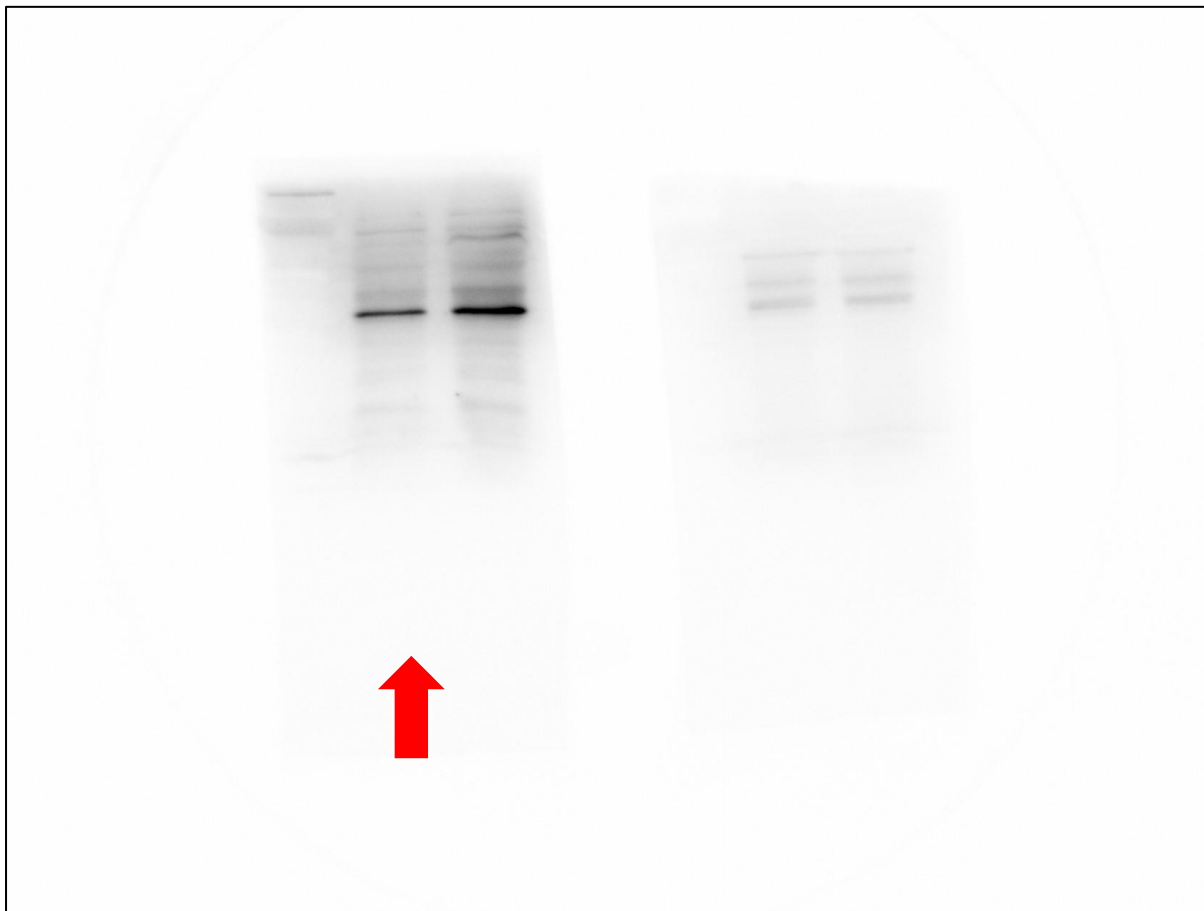

WB\_Fig2\_RIP1

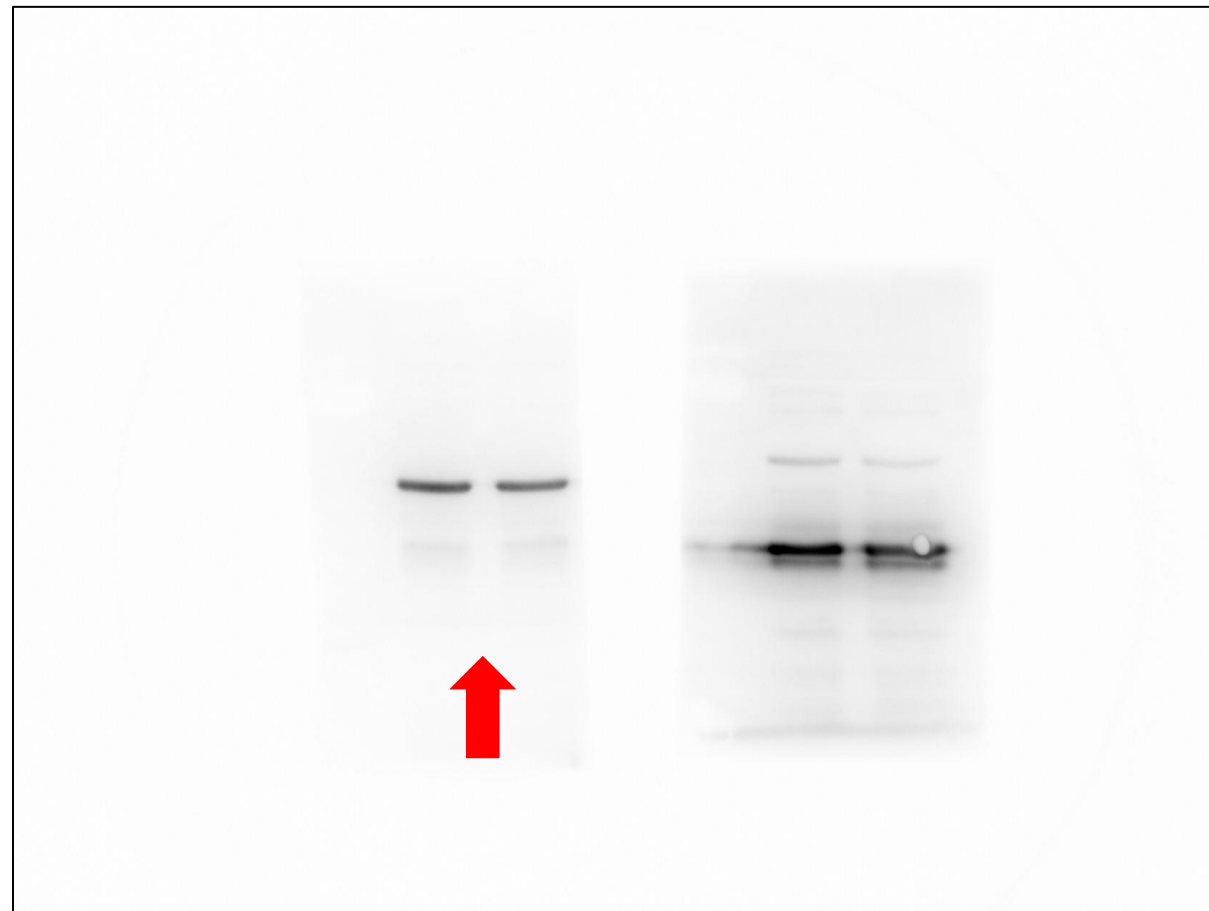

WB\_Fig2\_RIP1\_ACTIN

# Figure 2

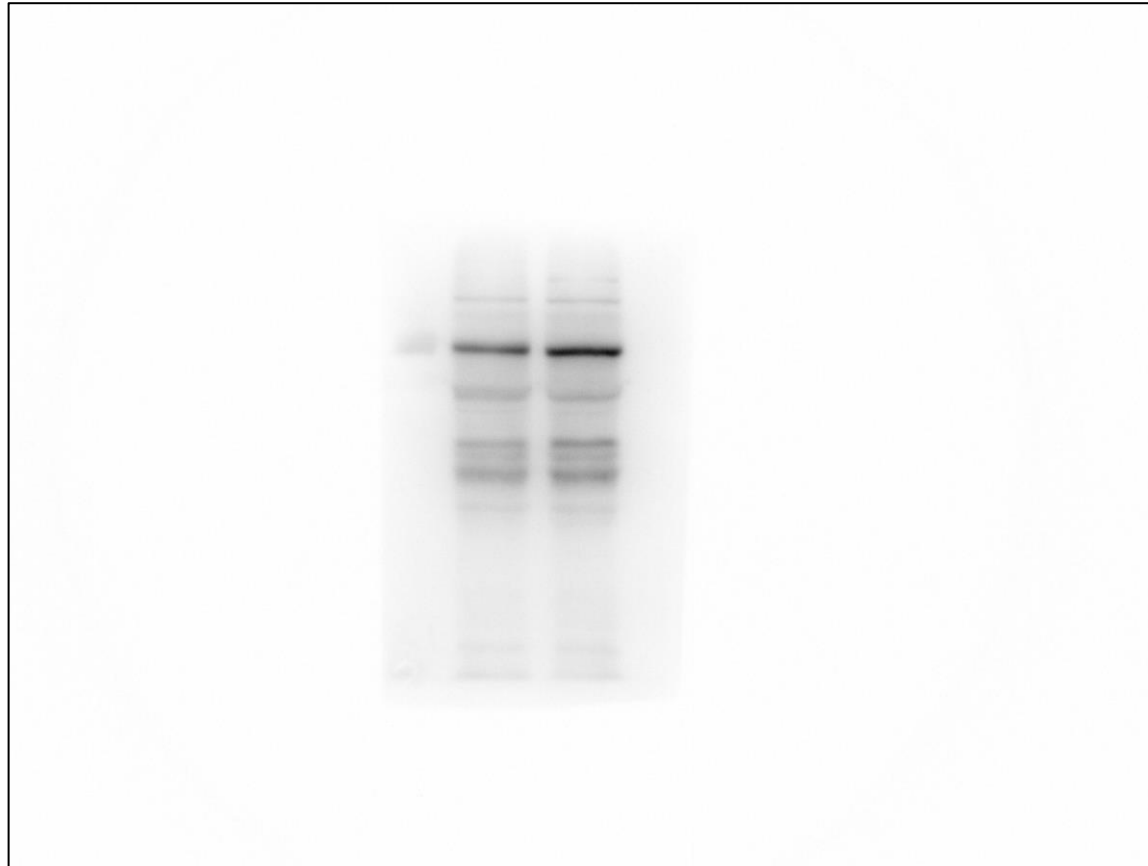

WB\_Fig2\_RIP3

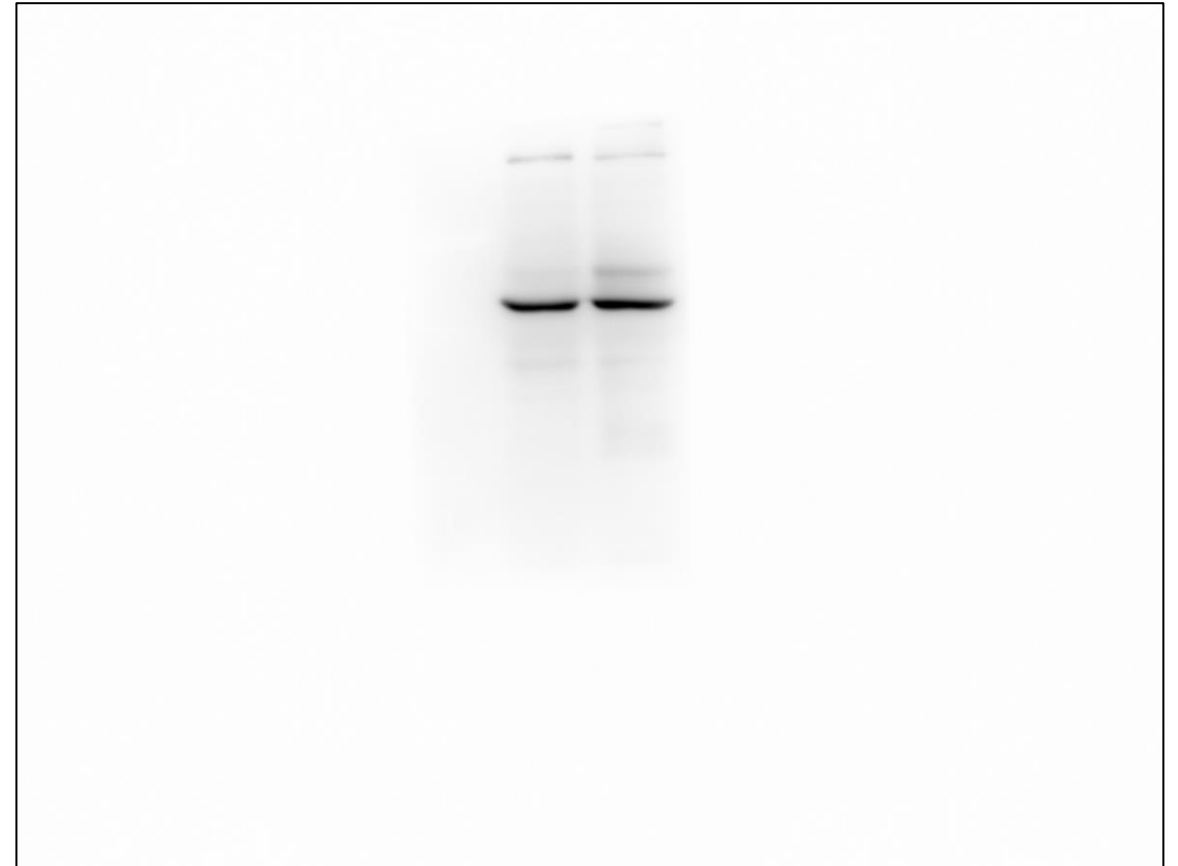

WB\_Fig2\_RIP3\_ACTIN

# Figure 2

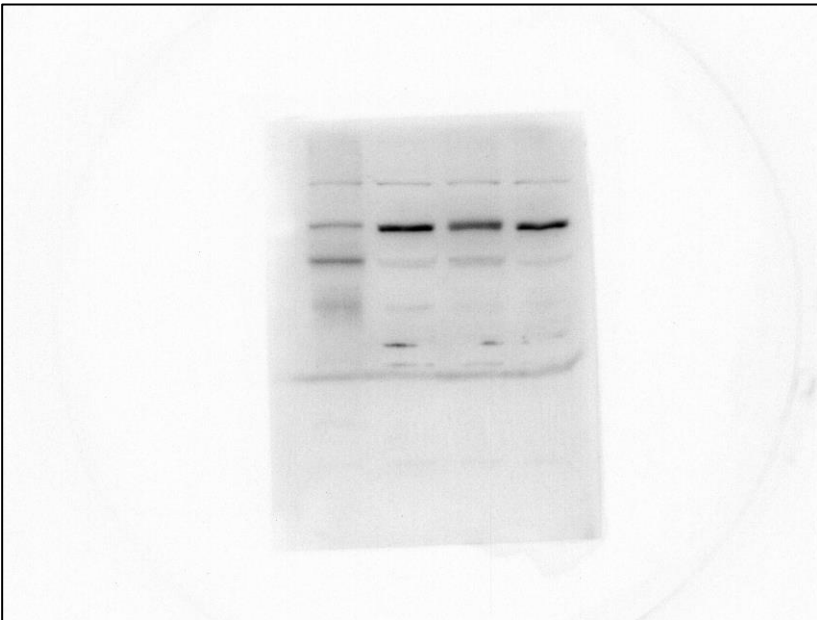

WB\_Fig2\_MLKL

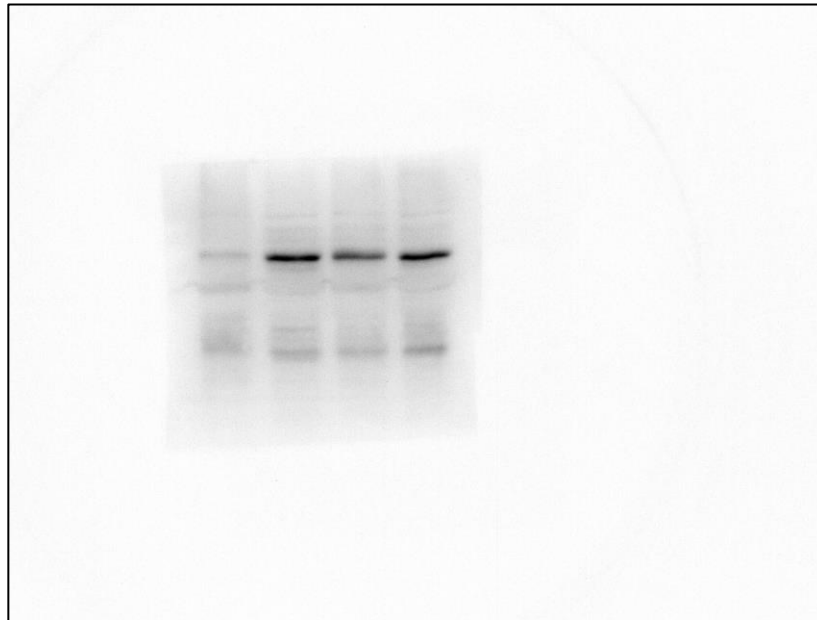

WB\_Fig2\_pMLKL

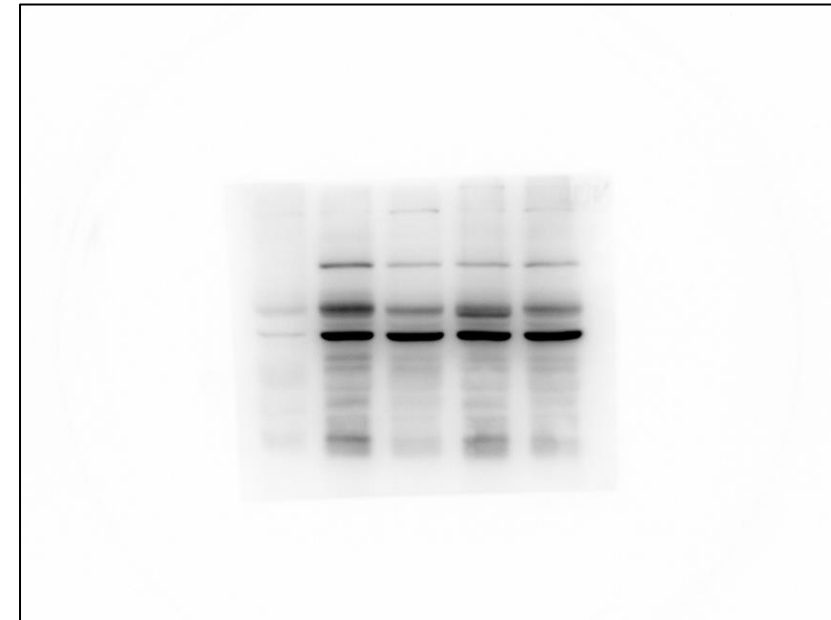

WB\_Fig2\_(p)MLKL\_actin

# Figure 3

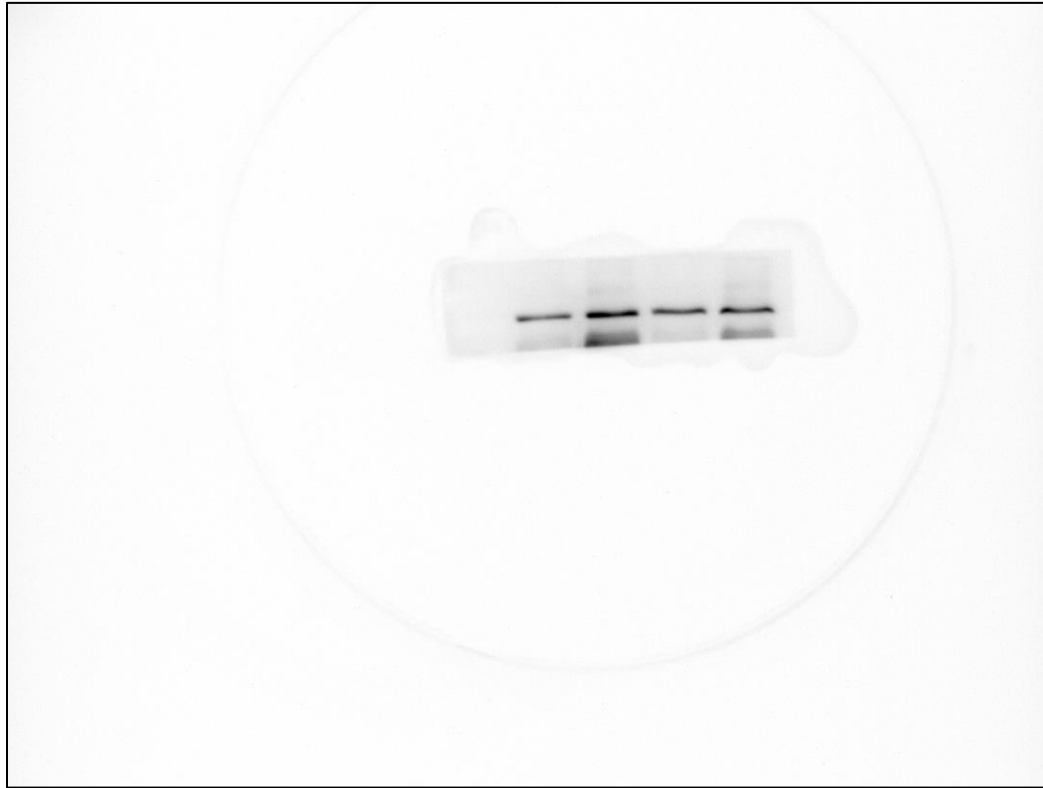

WB\_Fig3\_RIP1

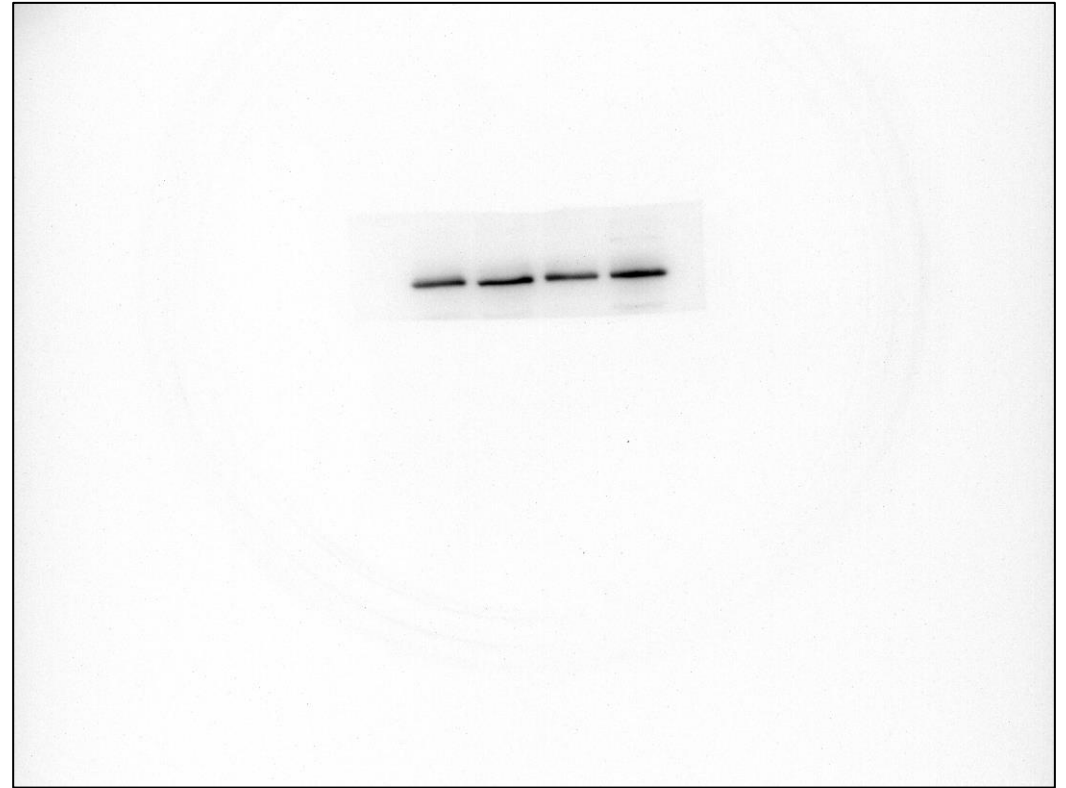

WB\_Fig3\_RIP1\_actin

# Figure 3

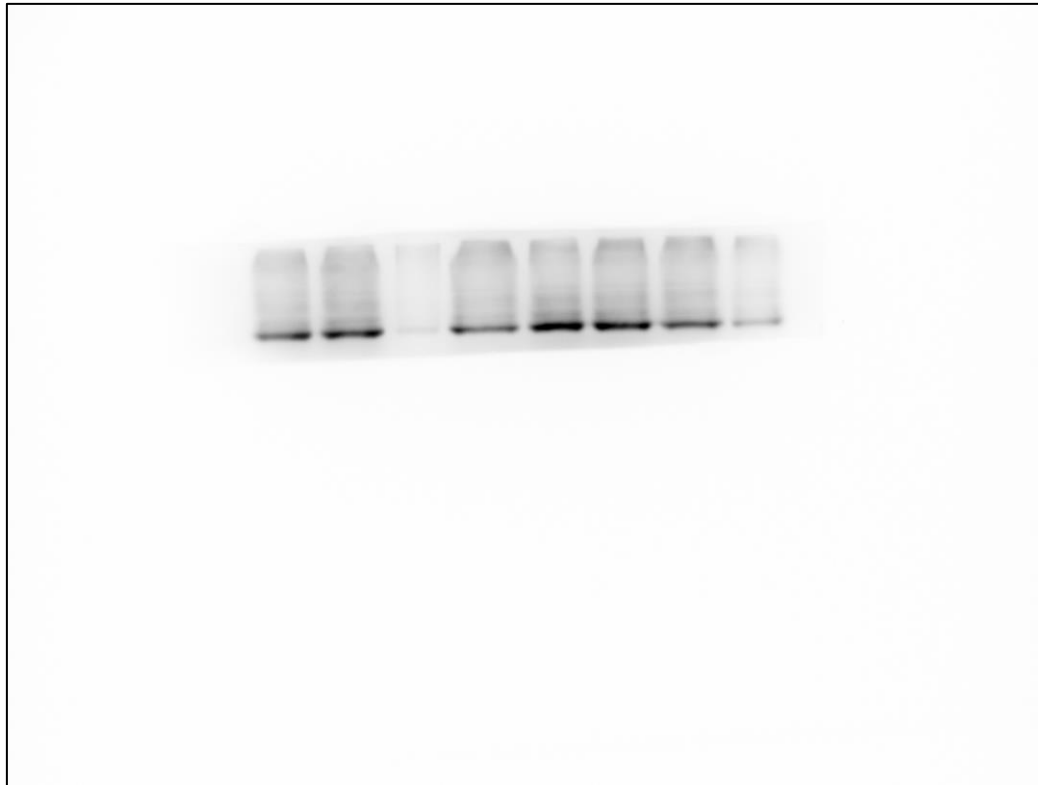

WB\_Fig3\_RIP3

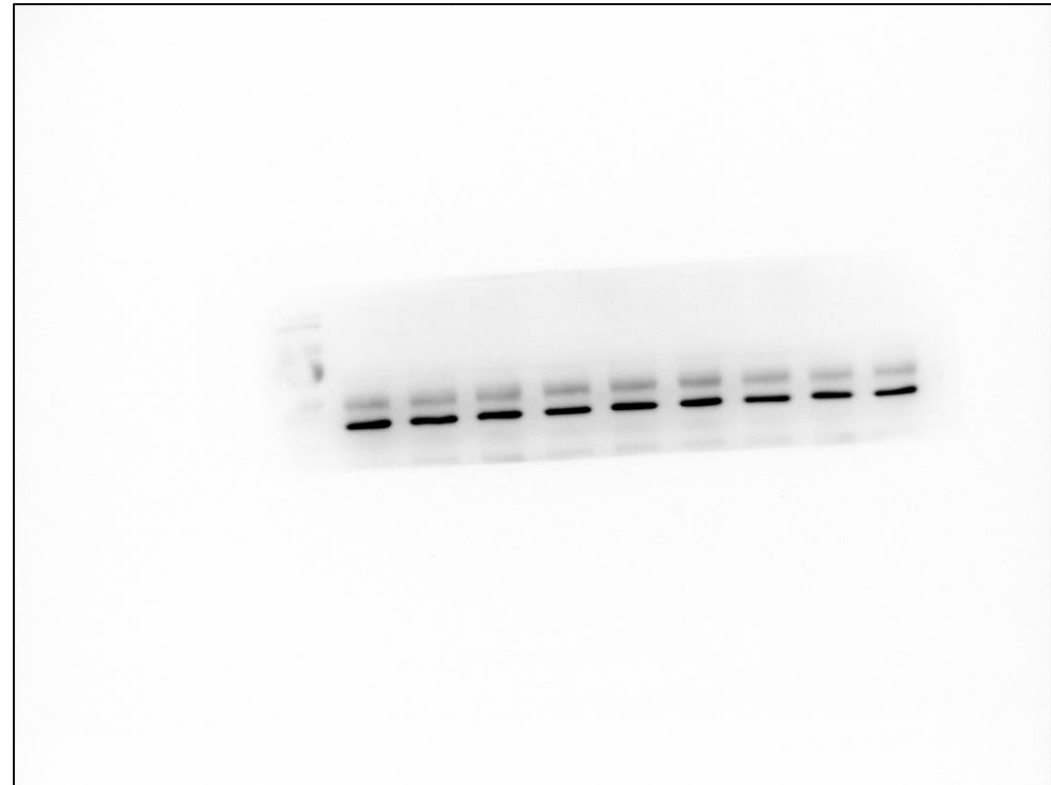

WB\_Fig3\_RIP3\_actin

# Figure 3

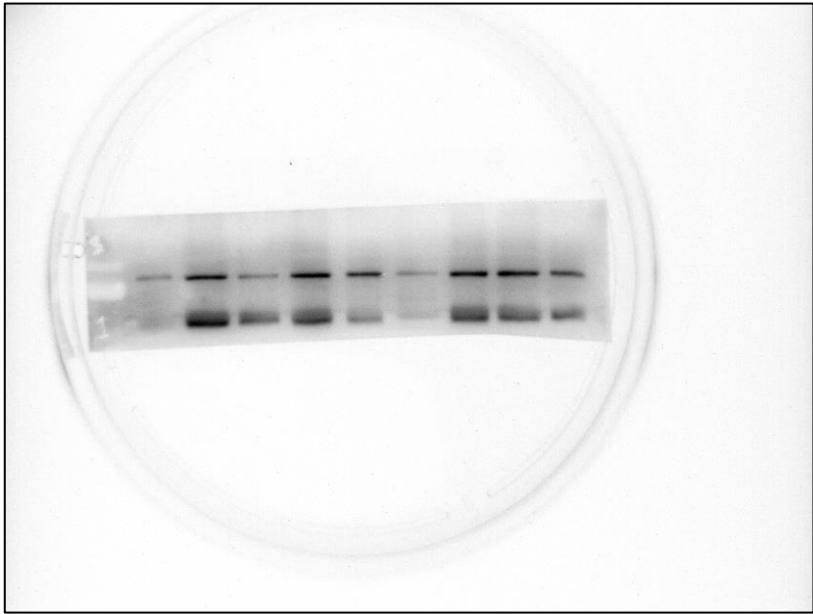

WB\_Fig3\_MLKL

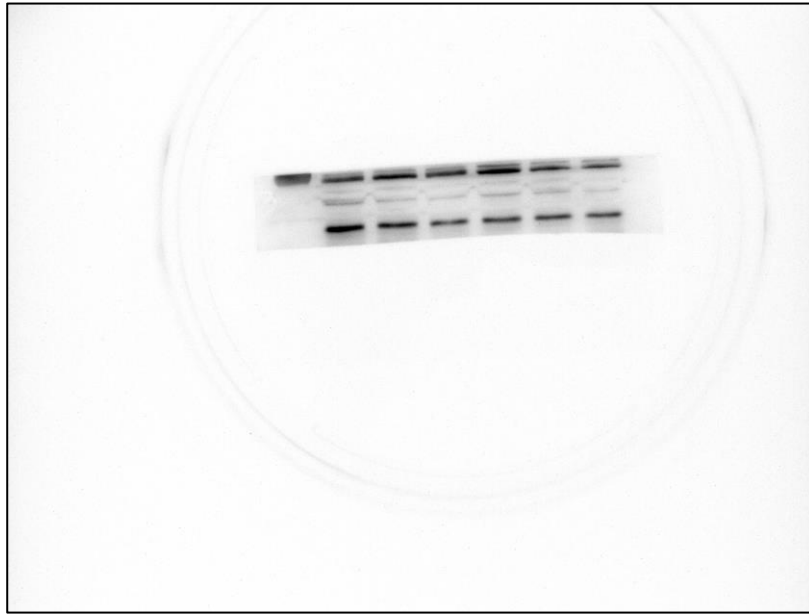

WB\_Fig3\_pMLKL

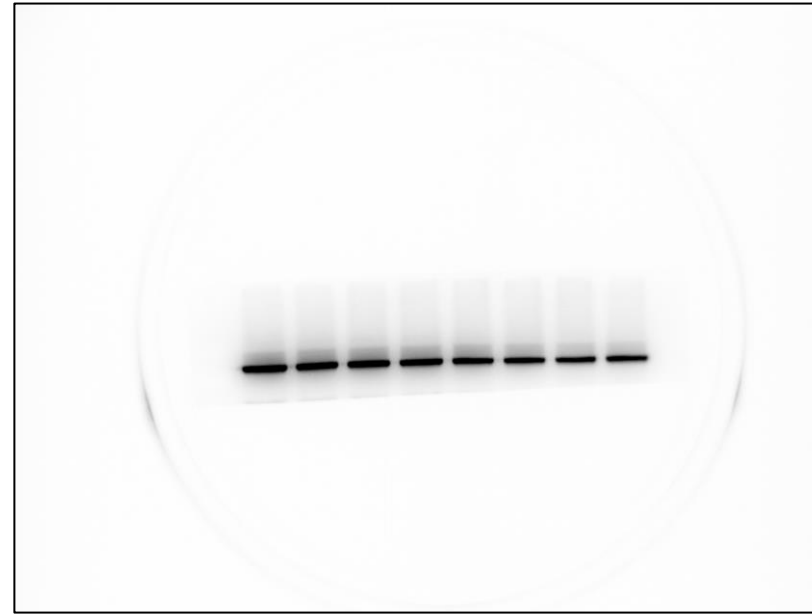

WB\_Fig3\_(p)MLKL\_actin

# Figure 6

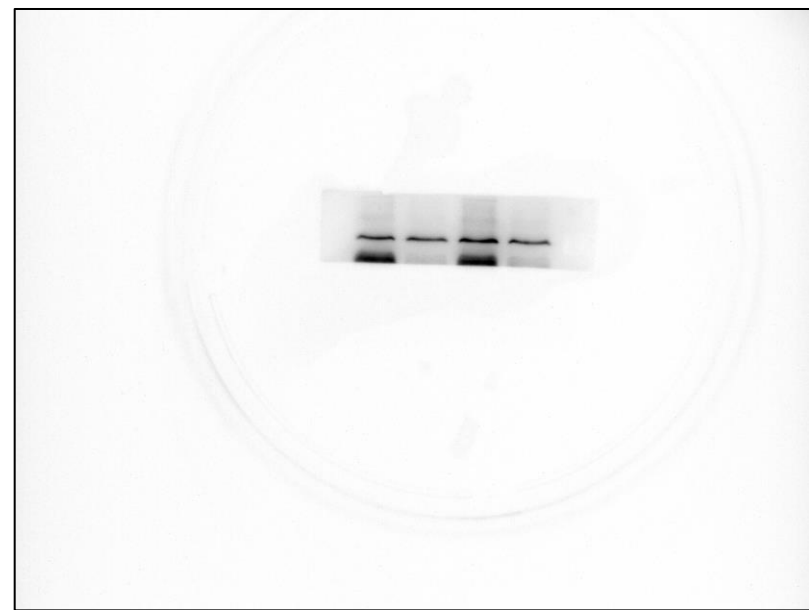

WB\_Fig6\_RIP1

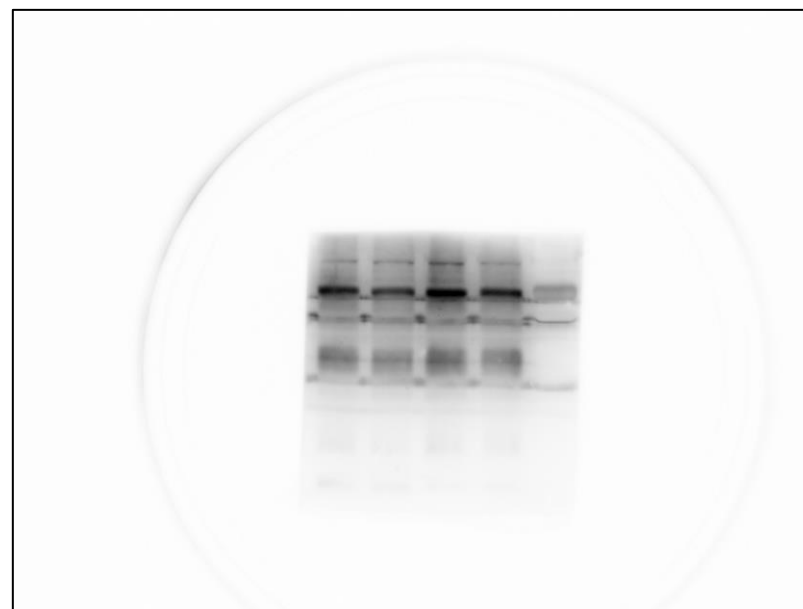

WB\_Fig6\_RIP3

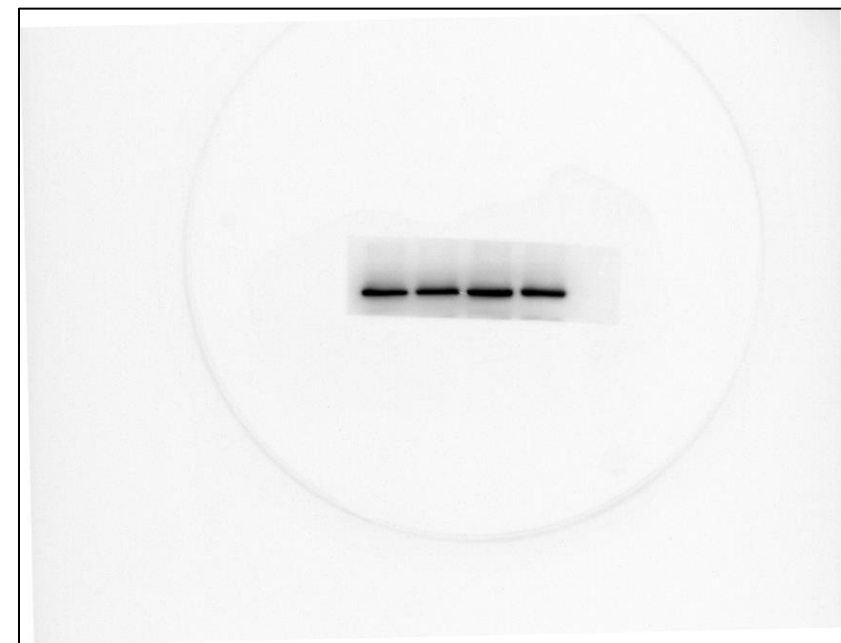

WB\_Fig6\_RIP1,3\_actin



# Figure 6

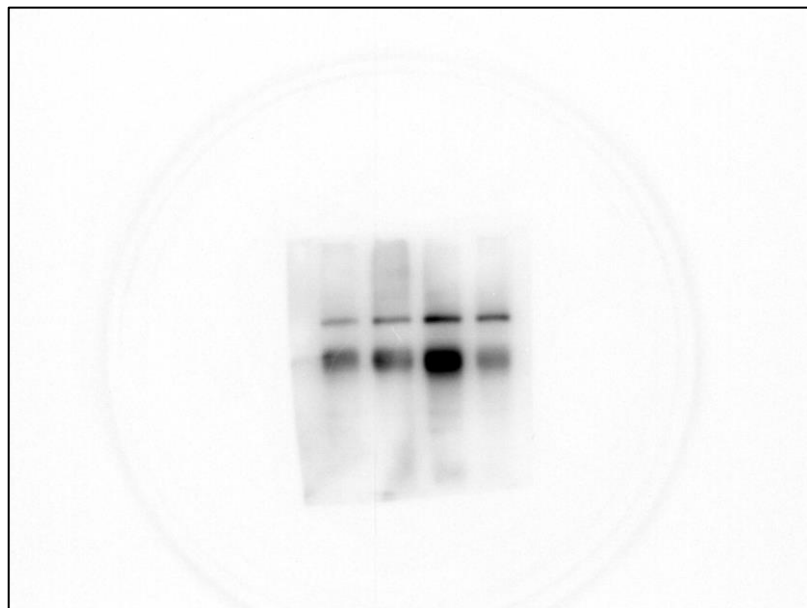

WB\_Fig6\_MLKL

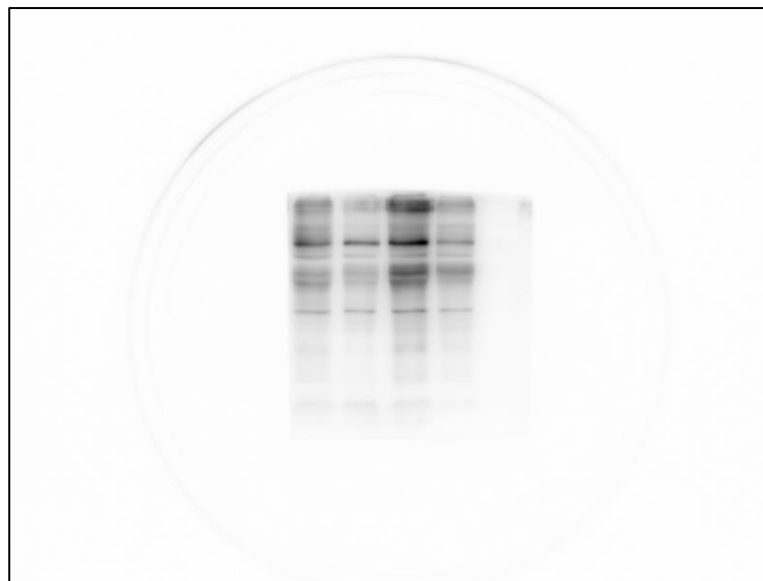

WB\_Fig6\_pMLKL

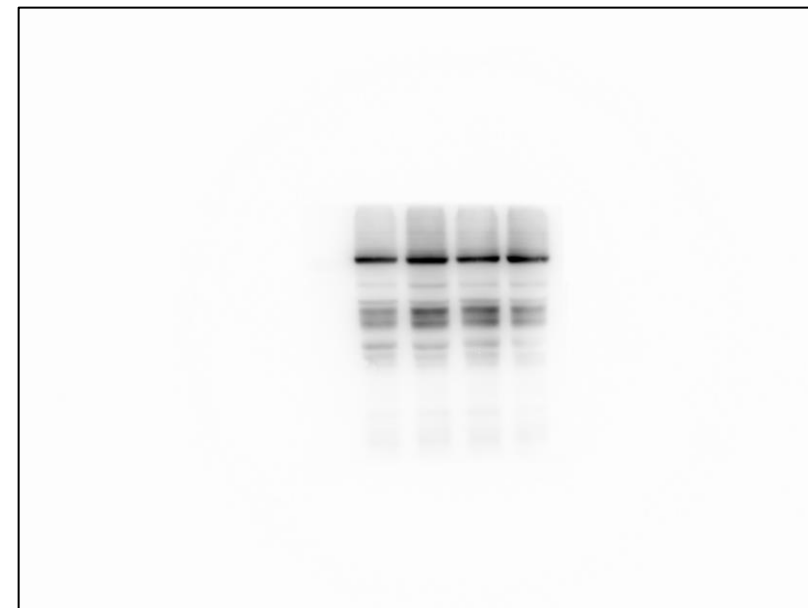

WB\_Fig6\_(p)MLKL\_actin
